# Supplementary material for: The Performance of Lateral Flow Tests in the Age of the Omicron: A Rapid Systematic Review
Source: MDPI journal article supplement (doi:10.3390/life12111941), 2022-11-21
Supplement: s1 [file s1]

**Table S1.** Risk of bias of studies included in this review, assessed using Meta Analysis of Statistics Assessment and Review Instrument (MAStARI) appraisal tool

| Study                 | Random sample | Criteria for inclusion | Confounding factors | Outcomes (objective criteria) | Sufficient description of the groups | Follow up | Outcomes of people who withdrew | Outcomes (measured in a reliable way) | Appropriate statistical analysis |
|-----------------------|---------------|------------------------|---------------------|-------------------------------|--------------------------------------|-----------|---------------------------------|---------------------------------------|----------------------------------|
| Adamson, 2022 [13]    | −             | −                      | −                   | +                             | −                                    | +         | −                               | ?                                     | +                                |
| Bayart, 2022 [14]     | −             | −                      | ?                   | +                             | −                                    | −         | −                               | +                                     | +                                |
| Bekliz, 2022 [15]     | −             | −                      | ?                   | +                             | −                                    | −         | −                               | +                                     | +                                |
| Deerain, 2021 [10]    | NA            | NA                     | NA                  | +                             | NA                                   | NA        | NA                              | +                                     | −                                |
| Gourgeon, 2022 [16]   | −             | −                      | −                   | +                             | −                                    | −         | −                               | ?                                     | −                                |
| Kanjilal, 2022 [17]   | −             | −                      | −                   | +                             | −                                    | −         | −                               | ?                                     | −                                |
| Schrom, 2022 [18]     | −             | −                      | −                   | +                             | −                                    | −         | −                               | ?                                     | −                                |
| Stanley, 2022 [19]    | NA            | NA                     | NA                  | +                             | NA                                   | NA        | NA                              | +                                     | −                                |
| Tsao, 2022 [20]       | −             | −                      | −                   | +                             | −                                    | −         | −                               | ?                                     | −                                |
| Weishampel, 2022 [21] | NA            | NA                     | NA                  | +                             | NA                                   | NA        | NA                              | +                                     | −                                |

Legend: +, low risk of bias; −, high risk of bias; ?, unclear; NA, not applicable
